# Supplementary material for: Island Extractions in the Wild: A Corpus Study of Adjunct and Relative Clause Islands in Danish and English
Source: MDPI journal article supplement (doi:10.3390/languages7020125), 2022-05-18
Supplement: s1 [file s1]

## Danish adjunct clause extraction – search strings used on KorpusDK

### *Hvis*-clauses

#### Topicalization

[ortho="Den"]|[ortho="Det"]|[ortho="De")] []{0, 2} [pos="N"] [pos="V"] [pos="PERS"][]{0, 3}[ortho="hvis"]  
[ortho="den"]|[ortho="det"]|[ortho="de")] []{0, 2} [pos="N"] [pos="V"] [pos="PERS"][]{0, 3}[ortho="hvis"]  
[ortho="Denne"]|[ortho="Disse"]|[ortho="Dette")] []{0, 1} [pos="N"] [pos="V"] [pos="PERS"] []{0, 3}  
[ortho="hvis"]  
[ortho="denne"]|[ortho="disse"]|[ortho="dette")] []{0, 1} [pos="N"] [pos="V"] [pos="PERS"][]{0, 3}[ortho="hvis"]  
[ortho="Det"] [pos="V"] [pos="PERS"] []{0, 3} [ortho="hvis"]  
[ortho="det"] [pos="V"] [pos="PERS"] []{0, 3} [ortho="hvis"]  
[ortho="(Den|Dem)"] [pos="V"] [pos="PERS"][]{0,3} [ortho="hvis"]  
[ortho="(den|dem)"] [pos="V"] [pos="PERS"][]{0,3} [ortho="hvis"]  
[ortho="(Mig|Dig|Hende|Ham|Os|Jer)"] [pos="V"] [pos="PERS"][]{0,3} [ortho="hvis"]  
[ortho="(mig|dig|hende|ham|os|jer)"] [pos="V"] [pos="PERS"][]{0,3} [ortho="hvis"]  
[ortho="Sådanne"]|[ortho="Sådan")][]{0, 2}[pos="N"] [pos="V"] [pos="PERS"][]{0, 3}[ortho="hvis"]  
[ortho="sådanne"]|[ortho="sådan")][]{0, 2}[pos="N"] [pos="V"] [pos="PERS"][]{0, 3}[ortho="hvis"]

#### *Wh*-extraction

[ortho="Hvilken"]|[ortho="Hvilket"]|[ortho="Hvilke")][]{0, 1} [pos="N"] [pos="V"] [pos="PERS"] []{0, 3}  
[ortho="hvis"]  
[ortho="hvilken"]|[ortho="hvilke"]|[ortho="hvilket")] []{0, 1} [pos="N"] [pos="V"] [pos="PERS"][]{0, 3}[ortho="hvis"]  
[ortho="Hvad"] [pos="V"] [pos="PERS"] []{0, 3} [ortho="hvis"]  
[ortho="hvad"] [pos="V"] [pos="PERS"] []{0, 3} [ortho="hvis"]

#### Relativization

[ortho="som"] [pos="PERS"] []{0, 3} [pos="V"][]{0, 3} [ortho="hvis"]

### *Når*-clauses

#### Topicalization

[ortho="Den"]|[ortho="Det"]|[ortho="De")] []{0, 2} [pos="N"] [pos="V"] [pos="PERS"][]{0, 3}[ortho="når"]  
[ortho="den"]|[ortho="det"]|[ortho="de")] []{0, 2} [pos="N"] [pos="V"] [pos="PERS"][]{0, 3}[ortho="når"]

[{ortho="Denne"}|[{ortho="Disse"}|[{ortho="Dette"}] ]]{0, 1} [pos="N"] [pos="V"] [pos="PERS"] ]]{0, 3}{ortho="når"}

[{ortho="denne"}|[{ortho="disse"}|[{ortho="dette"}] ]]{0, 1} [pos="N"] [pos="V"] [pos="PERS"] ]]{0, 3}{ortho="når"}

[ortho="Det"] [pos="V"] [pos="PERS"] ]]{0, 3} {ortho="når"}

[ortho="det"] [pos="V"] [pos="PERS"] ]]{0, 3} {ortho="når"}

[ortho="(Den|Dem)"] [pos="V"] [pos="PERS"] ]]{0,3} {ortho="når"}

[ortho="(den|dem)"] [pos="V"] [pos="PERS"] ]]{0,3} {ortho="når"}

[ortho="(Mig|Dig|Hende|Ham|Os|Jer)"] [pos="V"] [pos="PERS"] ]]{0,3} {ortho="når"}

[ortho="(mig|dig|hende|ham|os|jer)"] [pos="V"] [pos="PERS"] ]]{0,3} {ortho="når"}

[{ortho="Sådanne"}|[{ortho="Sådan"}] ]]{0, 2}[pos="N"] [pos="V"] [pos="PERS"] ]]{0, 3}{ortho="når"}

[{ortho="sådanne"}|[{ortho="sådan"}] ]]{0, 2}[pos="N"] [pos="V"] [pos="PERS"] ]]{0, 3}{ortho="når"}

### **Wh-extraction**

[{ortho="Hvilken"}|[{ortho="Hvilke"}|[{ortho="Hvilket"}] ]]{0, 1} [pos="N"] [pos="V"] [pos="PERS"] ]]{0, 3}{ortho="når"}

[{ortho="hvilken"}|[{ortho="hvilke"}|[{ortho="hvilket"}] ]]{0, 1} [pos="N"] [pos="V"] [pos="PERS"] ]]{0, 3}{ortho="når"}

[ortho="Hvad"] [pos="V"] [pos="PERS"] ]]{0, 3} {ortho="når"}

[ortho="hvad"] [pos="V"] [pos="PERS"] ]]{0, 3} {ortho="når"}

### **Relativization**

[ortho="som"] [pos="PERS"] ]]{0, 3} [pos="V"] ]]{0, 3} {ortho="når"}

### **Fordi-clauses**

#### **Topicalization**

[{ortho="Den"}|[{ortho="Det"}|[{ortho="De"}] ]]{0, 2} [pos="N"] [pos="V"] [pos="PERS"] ]]{0, 3}{ortho="fordi"}

[{ortho="den"}|[{ortho="det"}|[{ortho="de"}] ]]{0, 2} [pos="N"] [pos="V"] [pos="PERS"] ]]{0, 3}{ortho="fordi"}

[{ortho="Denne"}|[{ortho="Disse"}|[{ortho="Dette"}] ]]{0, 1} [pos="N"] [pos="V"] [pos="PERS"] ]]{0, 3}{ortho="fordi"}

[{ortho="denne"}|[{ortho="disse"}|[{ortho="dette"}] ]]{0, 1} [pos="N"] [pos="V"] [pos="PERS"] ]]{0, 3}{ortho="fordi"}

[ortho="Det"] [pos="V"] [pos="PERS"] ]]{0, 3} {ortho="fordi"}

[ortho="det"] [pos="V"] [pos="PERS"] []{0, 3} [ortho="fordi"]  
 [ortho="(Den|Dem)"] [pos="V"] [pos="PERS"] []{0,3} [ortho="fordi"]  
 [ortho="(den|dem)"] [pos="V"] [pos="PERS"] []{0,3} [ortho="fordi"]  
 [ortho="(Mig|Dig|Hende|Ham|Os|Jer)"] [pos="V"] [pos="PERS"] []{0,3} [ortho="fordi"]  
 [ortho="(mig|dig|hende|ham|os|jer)"] [pos="V"] [pos="PERS"] []{0,3} [ortho="fordi"]  
 ([ortho="Sådanne"]|[ortho="Sådan"])[pos="N"] [pos="V"] [pos="PERS"] []{0, 3}[ortho="fordi"]  
 ([ortho="sådanne"]|[ortho="sådan"])[pos="N"] [pos="V"] [pos="PERS"] []{0, 3}[ortho="fordi"]

### **Wh-extraction**

[ortho="Hvilken"]|[ortho="Hvilke"]|[ortho="Hvilket")] []{0, 1} [pos="N"] [pos="V"] [pos="PERS"] []{0, 3}[ortho="fordi"]  
 ([ortho="hvilken"]|[ortho="hvilke"]|[ortho="hvilket"])[pos="N"] [pos="V"] [pos="PERS"] []{0, 3}[ortho="fordi"]  
 [ortho="Hvad"] [pos="V"] [pos="PERS"] []{0,3} [ortho="fordi"]  
 [ortho="hvad"] [pos="V"] [pos="PERS"] []{0,3} [ortho="fordi"]

### **Relativization**

[ortho="som"] [pos="PERS"] []{0, 3} [pos="V"] []{0, 3} [ortho="fordi"]

## **Danish adjunct clause extraction – search strings used on Google**

bliver {jeg, han, hun, man} (meget, så) glad {hvis, når, fordi} / bliver {vi, de} (meget, så) glade {hvis, når, fordi}

bliver {jeg, han, hun, man} altid så glad når / bliver {vi, de} meget, altid så glade når

{jeg, han, hun, man} blive (meget, så) glad {hvis, når, fordi} / {vi, de} blive (meget, så) glade {hvis, når, fordi}

er {jeg, han, hun, man} (meget) glad {hvis, når, fordi} / er {vi, de} (meget) glade {hvis, når, fordi}

{jeg, han, hun, man} være (meget) glad {hvis, når, fordi} / {vi, de} være (meget) glade {hvis, når, fordi}

det bliver {jeg, du, han, hun, man} (så) glad {hvis, når, fordi} / det bliver {vi, de} (så) glade {hvis, når, fordi}

det er {jeg, du, han, hun, man} glad {hvis, når, fordi}

det ville {jeg, han, hun} blive (meget, så, rigtigt) glad hvis

det ville jeg være (meget, så, rigtigt) glad hvis

bliver {jeg, han, hun, man} (så) lykkelig {hvis, når, fordi} / bliver {vi, de} lykkelige {hvis, når, fordi}

{jeg, han, hun, man} blive lykkelig {hvis, når, fordi} / {vi, de} blive lykkelige {hvis, når, fordi}

er {jeg, han, hun, man} lykkelig {hvis, når, fordi} / er {vi, de} lykkelige {hvis, når, fordi}  
{jeg, han, hun, man} være lykkelig {hvis, når, fordi} / {vi, de} være lykkelige {hvis, når, fordi}  
det bliver {jeg, han, hun, man} lykkelig {hvis, når, fordi}  
det ville {jeg, han, hun} blive (så, meget) lykkelig hvis  
det ville jeg være (meget, så) lykkelig hvis

bliver {jeg, han, hun, man} (meget, så) sur {hvis, når, fordi} / bliver {vi, de} (meget, så) sure {hvis, når, fordi}  
bliver {jeg, han, hun, man} altid så sur når / bliver {vi, de} altid så sure når  
{jeg, han, hun, man} blive sur {hvis, når, fordi} / {vi, de} blive sure {hvis, når, fordi}  
er {jeg, han, hun, man} (meget) sur {hvis, når, fordi} / er {vi, de} (meget) sure {hvis, når, fordi}  
{jeg, han, hun, man} være sur {hvis, når, fordi} / {vi, de} være sure {hvis, når, fordi}  
pissesur(e) {hvis, når, fordi}  
smaddersur(e) {hvis, når, fordi}  
rigtig sur(e) {hvis, når, fordi}  
det bliver {jeg, du, han, hun, man} (pisse)sur {hvis, når, fordi}  
det ville jeg blive (meget, så) sur hvis  
det ville jeg være (meget, så) sur hvis

bliver {jeg, han, hun, man} (så) vred {hvis, når, fordi} / bliver {vi, de} vrede {hvis, når, fordi}  
{jeg, han, hun, man} blive vred {hvis, når, fordi} / {vi, de} blive vrede {hvis, når, fordi}  
er {jeg, han, hun, man} vred {hvis, når, fordi} / er {vi, de} vrede {hvis, når, fordi}  
{jeg, han, hun, man} være vred {hvis, når, fordi} / {vi, de} være vrede {hvis, når, fordi}  
det bliver {jeg, han, hun, man} vred {hvis, når, fordi}

bliver {jeg, han, hun, man} stolt {hvis, når, fordi} / bliver {vi, de} stolte {hvis, når, fordi}  
er {jeg, han, hun, man} stolt {hvis, når, fordi} / er {vi, de} stolte {hvis, når, fordi}

bliver {jeg, du, han, hun, man} (så, ofte) dårlig {hvis, når, fordi} / bliver {vi, de} (så) dårlige {hvis, når, fordi}  
{jeg, du, han, hun, man} blive (så) dårlig {hvis, når, fordi} / {vi, de} blive (så) dårlige {hvis, når, fordi}  
er {jeg, du, han, hun, man} (ofte) dårlig {hvis, når, fordi}

{jeg, du, han, hun, man} være dårlig {hvis, når, fordi}

det bliver {jeg, han, hun, man} (så, ofte, altid) dårlig {hvis, når, fordi}

bliver {jeg, man, han, hun} skuffet {hvis, når, fordi} / bliver {vi, de} skuffede {hvis, når, fordi}

{jeg, man, han, hun, vi} blive skuffet {hvis, når, fordi} / {vi, de} blive skuffede {hvis, når, fordi}

det bliver {jeg, han, hun, man} skuffet {hvis, når, fordi}

bliver {jeg, man, han, hun, vi} tosset {hvis, når, fordi}

{jeg, man, han, hun, vi} blive tosset {hvis, når, fordi}

bliver {jeg, han, hun, man} (så) tørstig {hvis, når, fordi}

bliver {jeg, man, du} syg {hvis, når, fordi}

{jeg, man, du} blive syg {hvis, når, fordi}

bliver jeg begejstret {hvis, når, fordi}

jeg blive begejstret {hvis, når, fordi}

er jeg begejstret {hvis, når, fordi}

jeg være begejstret {hvis, når, fordi}

panikslagen {hvis, når, fordi}

overrasket {hvis, når, fordi}

chockeret {hvis, når, fordi}

henrykt {hvis, når, fordi}

gal {hvis, når, fordi}

rasende {hvis, når, fordi}

sund {hvis, når, fordi}

svimmel {hvis, når, fordi}

hovepine {hvis, når, fordi}

migræne {hvis, når, fordi}

bange {hvis, når, fordi}

deprimeret {hvis, når, fordi}

træt {hvis, når, fordi}

nervøs {hvis, når, fordi}

vild {hvis, når, fordi}

irriteret {hvis, når, fordi}

bekymret {hvis, når, fordi}

falder {jeg, han, hun, man, vis, de} i søvn {hvis, når, fordi}

græder {jeg, han, hun, man, vi, de} {hvis, når, fordi}

{jeg, han, hun, man, vi, de} græde {hvis, når, fordi}

græder {jeg, han, hun, man, vi, de} altid når

grædt {jeg, han, hun, man, vi, de} {når, fordi}

dør {jeg, han, hun, man, vi, de} {hvis, når, fordi}

{jeg, han, hun, man} dø {hvis, når, fordi}

besvimer {jeg, han, hun, man, vi, de} {hvis, når, fordi}

{jeg, han, hun, man} besvime {hvis, når, fordi}

skriger {jeg, han, hun, man, vi, de} {hvis, når, fordi}

{jeg, han, hun, man} skrige {hvis, når, fordi}

griner {jeg, han, hun, man, vi, de} {hvis, når, fordi}

{jeg, han, hun, man} grine {hvis, når, fordi}

kaster {jeg, han, hun, man, vi, de} jeg op {hvis, når, fordi}

{jeg, han, hun, man} kaste op {hvis, når, fordi}

som {jeg, du, han, hun, man} ville blive (meget, rigtigt, så) glad hvis / som {vi, de} ville blive (meget) glade hvis

som {jeg, du, man, han, hun} bliver (meget) glad {hvis, når, fordi} / som {vi, de} bliver (meget) glade {hvis, når, fordi}

som {jeg, du, han, hun, man} er (meget) glad {hvis, når, fordi} / som {vi, de} er (meget) glade {hvis, når, fordi}

som {jeg, du, han, hun, man} ville være (meget) glad hvis / som {vi, de} ville være (meget) glade hvis

som {jeg, du, han, hun, man} ville blive (meget) lykkelig hvis / som {vi, de} ville blive (meget) lykkelige hvis

som {jeg, du, han, hun, man} (altid) bliver lykkelig {hvis, når, fordi} / som {vi, de} bliver lykkelige {hvis, når, fordi}

som {jeg, du, han, hun, man} ville være (meget) lykkelig hvis / som {vi, de} ville være (meget) lykkelige hvis

som {jeg, du, han, hun, man} er lykkelig {hvis, når, fordi} / som {vi, de} er lykkelige {hvis, når, fordi}

som {jeg, du, han, hun, man} ville blive (meget) sur hvis / som {vi, de} ville blive (meget) sure hvis

som {jeg, man, han, hun} (altid) bliver (rigtigt) sur {hvis, når, fordi}

som jeg ville være (meget, rigtigt) sur hvis

som {jeg, han, hun} ville blive (meget, så) vred hvis

som {jeg, han, hun, man} bliver (så) vred {hvis, når, fordi}

som {jeg, han, hun} ville være (meget) vred hvis

som {jeg, du, han, hun, man, vi, de} ville blive (meget) skuffet hvis

som {jeg, du, man, hun, han, vi, de} (altid) bliver skuffet {hvis, når, fordi}

som {jeg, du, han, hun, man, vi, de} ville være skuffet hvis

som {jeg, du, han, hun, vi, de} er skuffet {hvis, når, fordi}

som jeg ville blive dårlig hvis

som {jeg, han} (altid, ofte) bliver dårlig {hvis, når, fordi}

som jeg bliver panikslagen {hvis, når, fordi} / som jeg ville blive panikslagen hvis

som jeg bliver overrasket {hvis, når, fordi} / som {jeg, du, han, hun, man, vi, de} ville blive (meget) overrasket hvis

som jeg bliver chockeret {hvis, når, fordi} / som jeg ville blive chokeret hvis

som jeg bliver henrykt {hvis, når, fordi} / som jeg ville blive henrykt hvis

som {jeg, du, han, hun, man} bliver gal {hvis, når, fordi} / som {vi, de} bliver gale {hvis, når, fordi}

som {jeg, du, han, hun, man} ville blive gal hvis / som {vi, de} ville blive gale hvis

som {jeg, du, han, hun, man, vi, de} bliver rasende {hvis, når, fordi}

som {jeg, du, han, hun, man, vi, de} ville blive rasende hvis

som jeg bliver sund {hvis, når, fordi} / som jeg ville blive sund hvis

som {jeg, du, han, hun, man} bliver svimmel {hvis, når, fordi} / som jeg ville blive svimmel hvis

som {jeg, man} får hovedpine {hvis, når, fordi} / som {jeg, man} ville få hovedpine hvis

som jeg får migræne {hvis, når, fordi} / som jeg ville få migræne hvis

som {jeg, du, han, hun, man, vi, de} bliver bange {hvis, når, fordi}

som {jeg, du, han, hun, man, vi, de} ville blive bange hvis

som jeg bliver deprimeret {hvis, når, fordi} / som jeg ville blive deprimeret hvis

som {jeg, man, hun, han} (altid) bliver (så, meget) træt {hvis, når, fordi} / som {jeg, du, han, hun, man} ville blive træt hvis

som {jeg, du, han, hun, man} bliver nervøs {hvis, når, fordi} / som {vi, de} bliver nervøse {hvis, når, fordi}

som {jeg, du, han, hun, man} ville blive nervøs hvis / som {vi, de} ville blive nervøse hvis

som {jeg, du, han, hun, man} bliver vild {hvis, når, fordi} / som {jeg, du, han, hun, man} ville blive (helt) vild hvis

som jeg bliver irriteret {hvis, når, fordi} / som jeg ville blive irriteret hvis

som jeg bliver bekymret {hvis, når, fordi} / som jeg ville blive bekymret hvis

som {jeg, du, han, hun, man, vi, de} bliver tosset {hvis, når, fordi} / som {jeg, du, han, hun, man, vi, de} ville blive tosset hvis

som {jeg, du, han, hun, man} bliver syg {hvis, når, fordi} / som {vi, de} bliver syge {hvis, når, fordi}

som {jeg, du, han, hun, man} ville blive syg hvis / som {vi, de} ville blive syge hvis

som {jeg, du, han, hun, man} er (meget) dum {hvis, når, fordi} / som {vi, de} er (meget) dumme {hvis, når, fordi}

som {jeg, du, han, hun, man} ville være (meget) dum hvis / som {vi, de} ville være (meget) dumme hvis

som {jeg, du, han, hun, man, vi, de} (altid) græder {hvis, når, fordi}



som {jeg, du, han, hun, man, vi, de} ville græde hvis  
som {jeg, du, han, hun, man, vi, de} griner {hvis, når, fordi}  
som {jeg, du, han, hun, man, vi, de} ville grine hvis  
som {jeg, du, han, hun, man, vi, de} ville dø hvis  
som {jeg, du, han, hun, man, vi, de} dør {hvis, når, fordi}  
som {jeg, du, han, hun, man, vi, de} får ballade {hvis, når, fordi}  
som {jeg, du, han, hun, man, vi, de} besvimmer {hvis, når, fordi}  
som {jeg, du, han, hun, man, vi, de} ville besvimme hvis

## English adjunct clause extraction – search strings used on COCA and BNC

### ***If*-clauses**

#### ***Wh*-extraction**

Which NOUN \_vd \_pp \_vv if  
What \_vd \_pp \_vv if  
NOUN \_vd \_pp \* \_vv if  
Which NOUN \_vm \_pp \_vv if  
NOUN \_vm \_pp \* \_vv if  
Which NOUN VERB+ \_pp ADJ if  
NOUN VERB+ \_pp VERB+ ADJ if

#### **Relativization**

NN that|which|who \_pp \_vv if  
NN that|which|who \_pp \_vv \* if  
NN that|which|who \_pp \* \_vv if  
which \_pp \* \_vv ADV if  
NN that|which|who \_pp VERB+ ADJ if  
that|which|who \_pp VERB+ \* ADJ if  
that|which|who \_pp \* VERB+ ADJ if  
glad if

upset if

CRY when

would DIE if

### ***When*-clauses**

#### ***Wh*-extraction**

Which NOUN \_vd \_pp \_vv when

NOUN \_vd \_pp \* \_vv when

Which NOUN \_vm \_pp \_vv when

NOUN \_vm \_pp \* \_vv when

Which NOUN VERB+ \_pp ADJ when

NOUN VERB+ \_pp VERB+ ADJ when

#### **Relativization**

NN that|which|who \_pp \_vv when

NN that|which|who \_pp \_vv \* when

NN that|which|who \_pp \* \_vv when

which \_pp \* \_vv ADV when

NN that|which|who \_pp VERB+ ADJ when

that|which|who \_pp VERB+ \* ADJ when

that|which|who \_pp \* VERB+ ADJ when

glad when

upset when

CRY when

### ***Because*-clauses**

#### ***Wh*-extraction**

Which NOUN \_vd \_pp \_vv because

NOUN \_vd \_pp \* \_vv because

Which NOUN \_vm \_pp \_vv because

NOUN \_vm \_pp \* \_vv because

Which NOUN \_vh \_pp \_vv because

NOUN \_vh \_pp \* \_vv because

Which NOUN VERB+ \_pp ADJ because

NOUN VERB+ \_pp VERB+ ADJ because

### **Relativization**

NN that|which|who \_pp \_vv because

NN that|which|who \_pp \* \_vv because

which \_pp \* \_vv ADV because

NN that|which|who \_pp VERB+ ADJ because

that|which|who \_pp VERB+ \* ADJ because

that|which|who \_pp \* VERB+ ADJ because

glad because

upset because

CRY because

## **English adjunct clause extraction – search strings used on Google**

which {I, you, he, she, we, they} would be glad if

which {I, you, he, she, one, we, they} would die if

which {I, you, he, she, we, they} would cry if

which {I, you, he, she, one, we, they} would pass out if

which {I, you, he, she, one, we, they} would get mad if

which {I, you, he, she, we, they} would be (really) sad if

which {I, you, he, she, we, they} would get upset if

which it would be good if

which {I, you, he, she, we, they} would laugh if

which {I, you, he, she, they} would go crazy if

which {I, you, he, she, we, they} {got, get, gets} upset {if, when, because}

which {I, you, he, she, one, we, they} (always) cry/cries {if, when, because}

which {I, you, he, she} smile(s) {if, when, because}

which {I, you, he, she} scream(s) {if, when, because}

## Danish relative clause extraction – search strings used on KorpusDK

### Topicalization

```
[ortho="(Den|Det|De)"][]{}0, 2}[pos="N"][pos="V"][pos="PERS" & ortho="(jeg|du|vi|I|de)"][]{}1, 4}[ortho="(som|der)"]
```

```
[pos="KC"][ortho="(den|det|de)"][]{}0, 2}[pos="N"][pos="V"][pos="PERS" & ortho="(jeg|du|vi|I|de)"][]{}1, 4}[ortho="(som|der)"]
```

```
[ortho="(Den|Det|De)"][]{}0, 2}[pos="N"][pos="V"][pos="PERS" & ortho="(han|hun|man)"][]{}1, 4}[ortho="(som|der)"]
```

```
[pos="KC"][ortho="(den|det|de)"][]{}0, 2}[pos="N"][pos="V"][pos="PERS" & ortho="(han|hun|man)"][]{}1, 4}[ortho="(som|der)"]
```

```
[ortho="(Den|Det|De)"][]{}0, 2}[pos="N"][pos="V"][pos="PERS" & ortho="det"][]{}1, 4}[ortho="(som|der)"]
```

```
[pos="KC"][ortho="(den|det|de)"][]{}0, 2}[pos="N"][pos="V"][pos="PERS" & ortho="det"][]{}1, 4}[ortho="(som|der)"]
```

```
[ortho="(Den|Det|De)"][]{}0, 2}[pos="N"][pos="V"][ortho="der"][]{}1, 4}[ortho="(som|der)"]
```

```
[pos="KC"][ortho="(den|det|de)"][]{}0, 2}[pos="N"][pos="V"][ortho="der"][]{}1, 4}[ortho="(som|der)"]
```

```
[ortho="(Den|Det|Dem)"][pos="V"][pos="PERS" & ortho="(jeg|du|vi|I|de)"][]{}1, 4}[ortho="(som|der)"]
```

```
[pos="KC"][ortho="(den|det|dem)"][pos="V"][pos="PERS" & ortho="(jeg|du|vi|I|de)"][]{}1, 4}[ortho="(som|der)"]
```

```
[ortho="(Den|Det|Dem)"][pos="V"][pos="PERS" & ortho="(han|hun|man)"][]{}1, 4}[ortho="(som|der)"]
```

```
[pos="KC"][ortho="(den|det|dem)"][pos="V"][pos="PERS" & ortho="(han|hun|man)"][]{}1, 4}[ortho="(som|der)"]
```

```
[ortho="(Den|Det|Dem)"][pos="V"][pos="PERS" & ortho="det"][]{}1, 4}[ortho="(som|der)"]
```

```
[pos="KC"][ortho="(den|det|dem)"][pos="V"][pos="PERS" & ortho="det"][]{}1, 4}[ortho="(som|der)"]
```

```
[ortho="(Den|Det|Dem)"][pos="V"][ortho="der"][]{}1, 4}[ortho="(som|der)"]
```

```
[pos="KC"][ortho="(den|det|dem)"][pos="V"][ortho="der"][]{}1, 4}[ortho="(som|der)"]
```

```
[ortho="(Sådan|Sådanne)"][]{}0, 4}[pos="N"][pos="V"][pos="PERS" & ortho="(jeg|du|vi|I|de)"][]{}1, 4}[ortho="(som|der)"]
```

```
[pos="KC"][ortho="(sådan|sådanne)"][]{}0, 4}[pos="N"][pos="V"][pos="PERS" & ortho="(jeg|du|vi|I|de)"][]{}1, 4}[ortho="(som|der)"]
```

[ortho="(Sådan|Sådanne)"][] {0, 4} [pos="N"] [pos="V"] [pos="PERS" & ortho="(han|hun|man)"] [] {1, 4} [ortho="(som|der)"]

[ortho="(Sådan|Sådanne)"][] {0, 4} [pos="N"] [pos="V"] [pos="PERS" & ortho="det"] [] {1, 4} [ortho="(som|der)"]

[ortho="(Sådan|Sådanne)"][] {0, 4} [pos="N"] [pos="V"] [ortho="der"] [] {1, 4} [ortho="(som|der)"]

[ortho="Sådan"] [pos="V"] [pos="PERS" & ortho="(jeg|du|vi|i|de)"] [] {1, 4} [ortho="(som|der)"]

[pos="KC"] [ortho="sådan"] [pos="V"] [pos="PERS" & ortho="(jeg|du|vi|i|de)"] [] {1, 4} [ortho="(som|der)"]

[ortho="Sådan"] [pos="V"] [pos="PERS" & ortho="(han|hun|man)"] [] {1, 4} [ortho="(som|der)"]

[pos="KC"] [ortho="sådan"] [pos="V"] [pos="PERS" & ortho="(han|hun|man)"] [] {1, 4} [ortho="(som|der)"]

[ortho="Sådan"] [pos="V"] [pos="PERS" & ortho="det"] [] {1, 4} [ortho="(som|der)"]

[pos="KC"] [ortho="sådan"] [pos="V"] [pos="PERS" & ortho="det"] [] {1, 4} [ortho="(som|der)"]

[ortho="Sådan"] [pos="V"] [ortho="der"] [] {1, 4} [ortho="(som|der)"]

[pos="KC"] [ortho="sådan"] [pos="V"] [ortho="der"] [] {1, 4} [ortho="(som|der)"]

[ortho="(Mig|Dig|Hende|Ham|Os|Jer)"] [pos="V"] [pos="PERS" & ortho="(jeg|du|vi|i|de)"] [] {1, 4} [ortho="(som|der)"]

[pos="KC"] [ortho="(mig|dig|hende|ham|os|jer)"] [pos="V"] [pos="PERS" & ortho="(jeg|du|vi|i|de)"] [] {1, 4} [ortho="(som|der)"]

[ortho="(Mig|Dig|Hende|Ham|Os|Jer)"] [pos="V"] [pos="PERS" & ortho="(han|hun|man)"] [] {1, 4} [ortho="(som|der)"]

[pos="KC"] [ortho="(mig|dig|hende|ham|os|jer)"] [pos="V"] [pos="PERS" & ortho="(han|hun|man)"] [] {1, 4} [ortho="(som|der)"]

[ortho="(Mig|Dig|Hende|Ham|Os|Jer)"] [pos="V"] [pos="PERS" & ortho="det"] [] {1, 4} [ortho="(som|der)"]

[pos="KC"] [ortho="(mig|dig|hende|ham|os|jer)"] [pos="V"] [pos="PERS" & ortho="det"] [] {1, 4} [ortho="(som|der)"]

[ortho="(Mig|Dig|Hende|Ham|Os|Jer)"] [pos="V"] [ortho="der"] [] {1, 4} [ortho="(som|der)"]

[pos="KC"] [ortho="(mig|dig|hende|ham|os|jer)"] [pos="V"] [ortho="der"] [] {1, 4} [ortho="(som|der)"]

### **Wh-extraction**

[pos="DET" & ortho="(Hvilken|Hvilket|Hvilke|Hvis|Hvafter)"] [] {0, 2} [pos="N"] [pos="V"] [pos="PERS" & ortho="(jeg|du|vi|i|de)"] [] {1, 4} [ortho="(som|der)"]

[pos="KC"] [pos="DET" & ortho="(hvilken|hvilket|hvilke|hvis|hvafter)"] [] {0, 2} [pos="N"] [pos="V"] [pos="PERS" & ortho="(jeg|du|vi|i|de)"] [] {1, 4} [ortho="(som|der)"]

[pos="DET" & ortho="(Hvilken | Hvilket | Hvilke | Hvis | Hvaffor)"][] {0, 2} [pos="N"] [pos="V"] [pos="PERS" & ortho="(han | hun | man)"] [] {1, 4} [ortho="(som | der)"]

[pos="KC"] [pos="DET" & ortho="(hvilken | hvilket | hvilke | hvis | hvaffor)"] [] {0, 2} [pos="N"] [pos="V"] [pos="PERS" & ortho="(han | hun | man)"] [] {1, 4} [ortho="(som | der)"]

[pos="DET" & ortho="(Hvilken | Hvilket | Hvilke | Hvis | Hvaffor)"] [] {0, 2} [pos="N"] [pos="V"] [pos="PERS" & ortho="det"] [] {1, 4} [ortho="(som | der)"]

[pos="KC"] [pos="DET" & ortho="(hvilken | hvilket | hvilke | hvis | hvaffor)"] [] {0, 2} [pos="N"] [pos="V"] [pos="PERS" & ortho="det"] [] {1, 4} [ortho="(som | der)"]

[pos="DET" & ortho="(Hvilken | Hvilket | Hvilke | Hvis | Hvaffor)"] [] {0, 2} [pos="N"] [pos="V"] [ortho="der"] [] {1, 4} [ortho="(som | der)"]

[pos="KC"] [pos="DET" & ortho="(hvilken | hvilket | hvilke | hvis | hvaffor)"] [] {0, 2} [pos="N"] [pos="V"] [ortho="der"] [] {1, 4} [ortho="(som | der)"]

[ortho="(Hvad | Hvem | Hvilken | Hvilket | Hvilke | Hvis)"] [pos="V"] [pos="PERS" & ortho="(jeg | du | vi | I | de)"] [] {1, 4} [ortho="(som | der)"]

[pos="KC"] [ortho="(hvad | hvem | hvilken | hvilket | hvilke | hvis)"] [pos="V"] [pos="PERS" & ortho="(jeg | du | vi | I | de)"] [] {1, 4} [ortho="(som | der)"]

[ortho="(Hvad | Hvem | Hvilken | Hvilket | Hvilke | Hvis)"] [pos="V"] [pos="PERS" & ortho="(han | hun | man)"] [] {1, 4} [ortho="(som | der)"]

[pos="KC"] [ortho="(hvad | hvem | hvilken | hvilket | hvilke | hvis)"] [pos="V"] [pos="PERS" & ortho="(han | hun | man)"] [] {1, 4} [ortho="(som | der)"]

[ortho="(Hvad | Hvem | Hvilken | Hvilket | Hvilke | Hvis)"] [pos="V"] [pos="PERS" & ortho="det"] [] {1, 4} [ortho="(som | der)"]

[pos="KC"] [ortho="(hvad | hvem | hvilken | hvilket | hvilke | hvis)"] [pos="V"] [pos="PERS" & ortho="det"] [] {1, 4} [ortho="(som | der)"]

[ortho="(Hvad | Hvem | Hvilken | Hvilket | Hvilke | Hvis)"] [pos="V"] [ortho="der"] [] {1, 4} [ortho="(som | der)"]

[pos="KC"] [ortho="(hvad | hvem | hvilken | hvilket | hvilke | hvis)"] [pos="V"] [ortho="der"] [] {1, 4} [ortho="(som | der)"]

([ortho="Hvad"] [ortho="for"] | [ortho="Hvaffor"]) ([ortho="(en | et | én | ét | noget | nogen | nogle)"] | [] {0, 2} [pos="N"]) [pos="V"] [pos="PERS" & ortho="(jeg | du | vi | I | de)"] [] {1, 4} [ortho="(som | der)"]

[pos="KC"] ([ortho="hvad"] [ortho="for"] | [ortho="hvaffor"]) ([ortho="(en | et | én | ét | noget | nogen | nogle)"] | [] {0, 2} [pos="N"]) [pos="V"] [pos="PERS" & ortho="(jeg | du | vi | I | de)"] [] {1, 4} [ortho="(som | der)"]

([ortho="Hvad"] [ortho="for"] | [ortho="Hvaffor"]) ([ortho="(en | et | én | ét | noget | nogen | nogle)"] | [] {0, 2} [pos="N"]) [pos="V"] [pos="PERS" & ortho="(han | hun | man)"] [] {1, 4} [ortho="(som | der)"]

([ortho="Hvad"] [ortho="for"] | [ortho="Hvaffor"]) ([ortho="(en | et | én | ét | noget | nogen | nogle)"] | [] {0, 2} [pos="N"]) [pos="V"] [pos="PERS" & ortho="det"] [] {1, 4} [ortho="(som | der)"]

[ortho="Hvad"][ortho="for"] [ortho="Hvaffor"]) ([ortho="(en|et|én|ét|noget|nogen|nogle)"]|[] {0, 2}{pos="N"} [pos="V"] [ortho="der"][] {1, 4}{ortho="(som|der)"}

[ortho="(Hvaffor|Hvilke|Hvilken|Hvilket)"] [pos="(INDP|NUM)"] [pos="V"] [pos="PERS" & ortho="(jeg|du|vi|I|de)"][] {1, 4}{ortho="(som|der)"}

[ortho="(Hvaffor|Hvilke|Hvilken|Hvilket)"] [pos="(INDP|NUM)"] [pos="V"] [pos="PERS" & ortho="(han|hun|man)"][] {1, 4}{ortho="(som|der)"}

[ortho="(Hvaffor|Hvilke|Hvilken|Hvilket)"] [pos="(INDP|NUM)"] [pos="V"] [pos="PERS" & ortho="det"][] {1, 4}{ortho="(som|der)"}

[ortho="(Hvaffor|Hvilke|Hvilken|Hvilket)"] [pos="(INDP|NUM)"] [pos="V"] [ortho="der"][] {1, 4}{ortho="(som|der)"}

## Relativization

[pos="N"] [ortho="som"] [pos="PERS"] [] {0, 3}{pos="V"}[] {1, 3}{ortho="(som|der)"}

[ortho="som"] [pos="PERS" & ortho="(jeg|du|han|hun|man|det|vi|I|de)"][] {0, 2} [lemma="være"][] {1, 4}{ortho="(som|der)"}

[ortho="som"] [ortho="der"][] {0, 2} [lemma="være"][] {1, 4}{ortho="(som|der)"}

[ortho="som"] [pos="PERS" & ortho="(jeg|du|han|hun|man|det|vi|I|de)"][] {0, 2} [lemma="findes"][] {1, 4}{ortho="(som|der)"}

[ortho="som"] [ortho="der"][] {0, 2} [lemma="findes"][] {1, 4}{ortho="(som|der)"}

[ortho="som"] [pos="PERS" & ortho="(jeg|du|han|hun|man|det|vi|I|de)"][] {0, 2} [lemma="kende"][] {1, 4}{ortho="(som|der)"}

[ortho="som"] [pos="PERS" & ortho="(jeg|du|han|hun|man|det|vi|I|de)"][] {0, 2} [lemma="se"][] {1, 4}{ortho="(som|der)"}

[ortho="som"] [pos="PERS" & ortho="(jeg|du|han|hun|man|det|vi|I|de)"][] {0, 2} [lemma="finde"][] {1, 4}{ortho="(som|der)"}

[ortho="som"] [pos="PERS" & ortho="(jeg|du|han|hun|man|det|vi|I|de)"][] {0, 2} [lemma="møde"][] {1, 4}{ortho="(som|der)"}

[ortho="som"] [pos="PERS" & ortho="(jeg|du|han|hun|man|det|vi|I|de)"][] {0, 2} [lemma="beundre"][] {1, 4}{ortho="(som|der)"}

[ortho="som"] [pos="PERS" & ortho="(jeg|du|han|hun|man|det|vi|I|de)"][] {0, 2} [lemma="hade"][] {1, 4}{ortho="(som|der)"}

[ortho="som"] [pos="PERS" & ortho="(jeg|du|han|hun|man|det|vi|I|de)"][] {0, 2} [lemma="afsky"][] {1, 4}{ortho="(som|der)"}

[ortho="som"] [ortho="der"][] {0, 2} [lemma="eksistere"][] {1, 4}{ortho="(som|der)"}

## English relative clause extraction – search strings used on COCA, BNC and GloWbE

### **Wh-extraction**

What \_vd \_pp \_vv \_p who

NOUN \_vd \_pp \_vv \_p who

NOUN \_vd \_pp \_vv \_p that

NOUN \_vm \_pp \_vv \_p who

NOUN \_vm \_pp \_vv \_p that

### **Relativization**

NN that|which|who \_pp \_vv \_p who

NN that|which|who \_pp \_vv \_p that

that|which \_pp \* \_vv \_p that|who

which \_pp \_vv \_p that|who

that|which \_pp [be] the only \* that|who

that|which \_pp [be] \* the only \* that|who

that|which \_pp \* [be] the only \* that|who

which \* [be] the only \* that|who

that|which there [be] many \* who|that

that|which there [be] many who|that

that|which there [be] \* many who|that

that|which there \* [be] many who|that

that|which there \* \* [be] many who|that

that|which there \* [be] \* many who|that

that|which there \* [be] many \* who|that

that|which there \* [be] \* many \* who|that

that|which there [be] \* many \* who|that

that|which there [be] a lot of \* who|that

that|which there [be] \* a lot of \* who|that



that|which there \* [be] a lot of \* who|that  
that|which there [be] \_p who|that  
that|which there \* [be] \_p that  
that|which there [be] \* \_p who  
that|which there [be] nobody who|that  
that|which there [be] \* nobody who|that  
that|which there \* [be] nobody who|that  
that|which there [be] somebody who|that  
that|which there [be] \* somebody who|that  
that|which there [be] someone who|that

## English relative clause extraction – search strings used on Google

which I don't know anybody who  
which I don't know anyone who  
which I've never met anybody who  
which I've never met anyone who  
which there are many who  
which there are many people who  
{which, that} I admire everyone who  
which I know someone who  
which (I think) {I am, you are, he is, she is, we are, they are} the only one(s) who  
which (I thought) {I was, you were, he was, she was, we were, they were} the only one[s] who  
which (I think, I thought) {I am, I was, you are, you were, he is, he was, she is, she was} the only person who  
which (I think) {I am, you are, he is, she is, we are, they are} the first {one(s), American(s), person(s)} who
